# Supplementary material for: Investigation of parasite genetic variation and systemic immune responses in patients presenting with different clinical presentations of cutaneous leishmaniasis caused by Leishmania aethiopica
Source: PubMed Central journal article supplement (PMC11484111; doi:10.1186/s40249-024-01244-x), 2024-10-16
Supplement: 40249_2024_1244_MOESM2_ESM.pdf [file 40249_2024_1244_MOESM2_ESM.pdf]

A

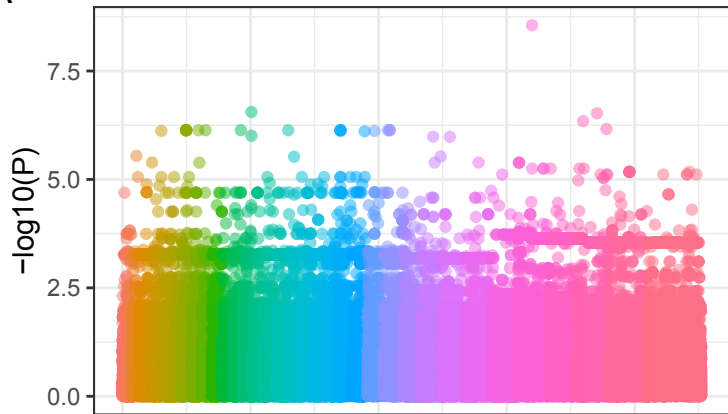

Figure S1

genomic position

B

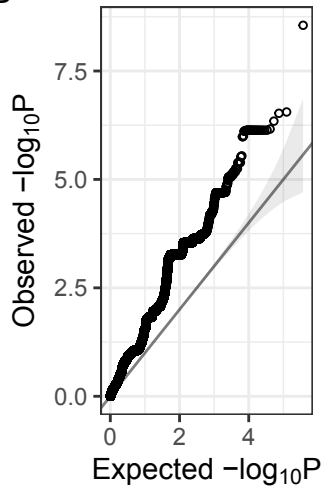Expected  $-\log_{10}P$
